# Supplementary material for: Investigation of Tumor Heterogeneity Using Integrated Single-Cell RNA Sequence Analysis to Focus on Genes Related to Breast Cancer-, EMT-, CSC-, and Metastasis-Related Markers in Patients with HER2-Positive Breast Cancer
Source: MDPI journal article supplement (doi:10.3390/cells12182286), 2023-09-15

A

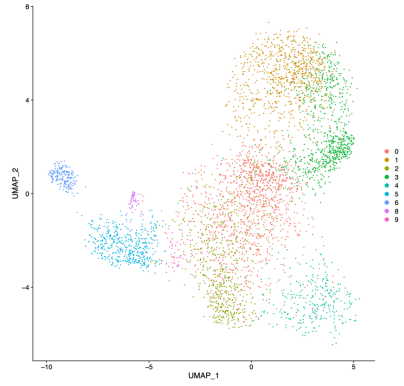

**Figure S1. Single-cell analysis of the epithelial components of luminal-HER2 (ER-positive/HER2-positive) breast cancer**

(A) A UMAP plot of epithelial cells in the luminal-HER2 breast samples.

(B) UMAP plots with representative marker expression.

(C) Violin plots with representative marker expression.

B

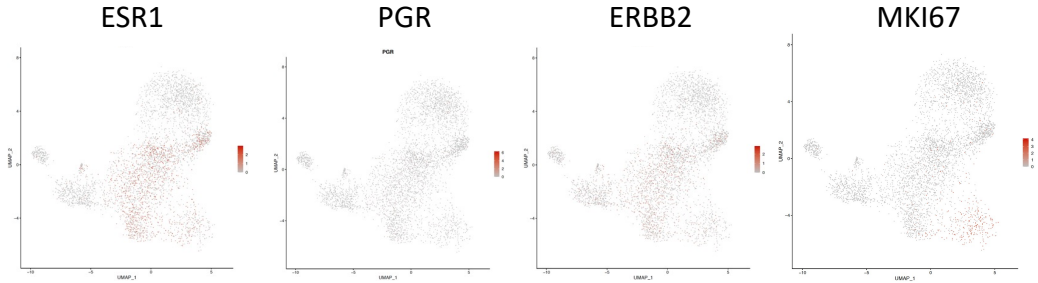

C

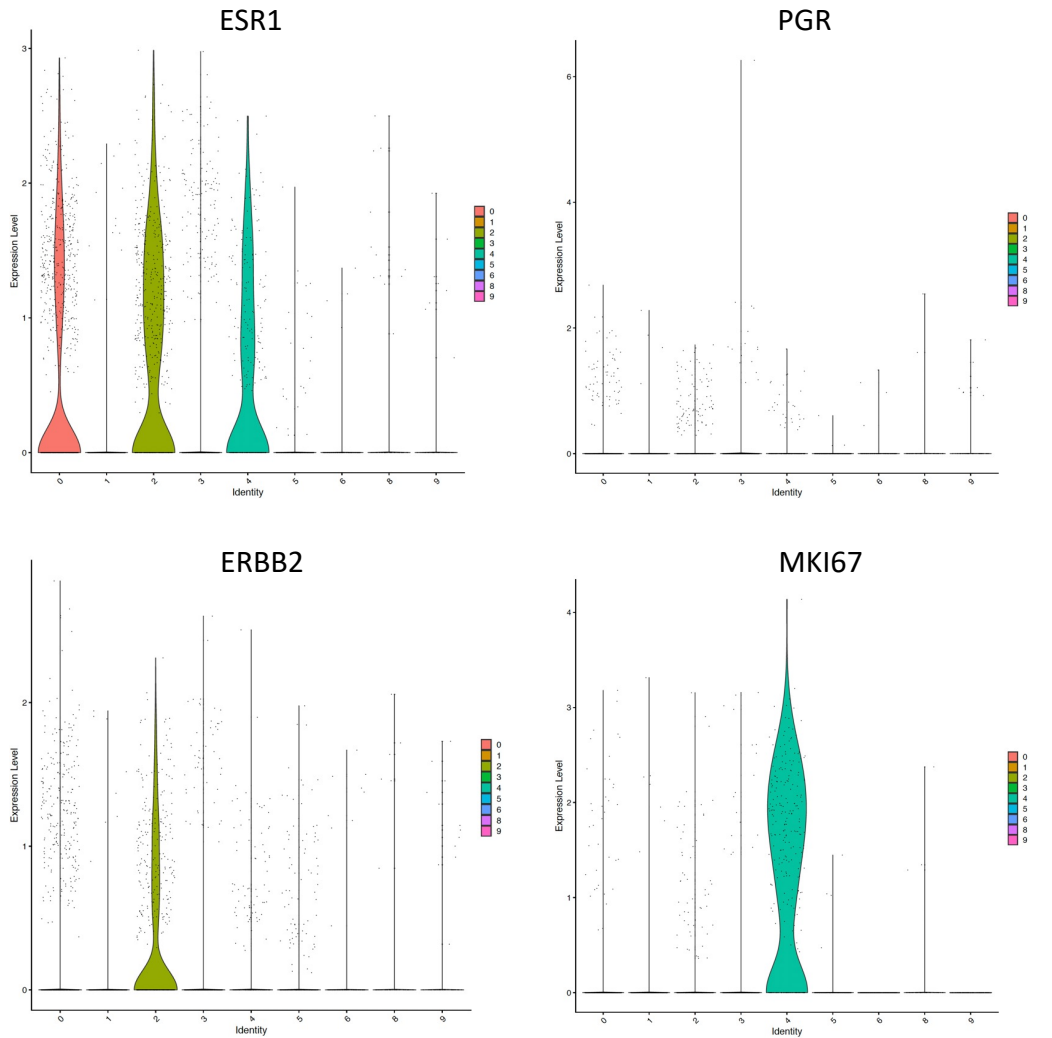

**A**

**Figure S2. Single-cell analysis of the epithelial components of pure-HER2 (ER-negative/HER2-positive) breast cancer**

(A) A UMAP plot of epithelial cells of the pure-HER2 breast samples.

(B) UMAP plots with representative marker expression.

(C) Violin plots with representative marker expression.

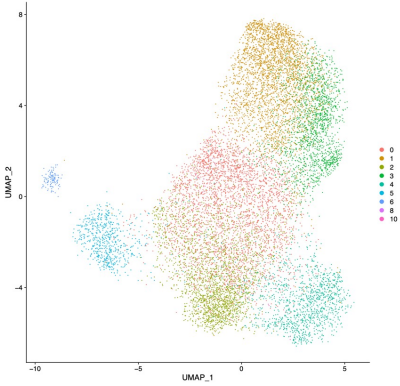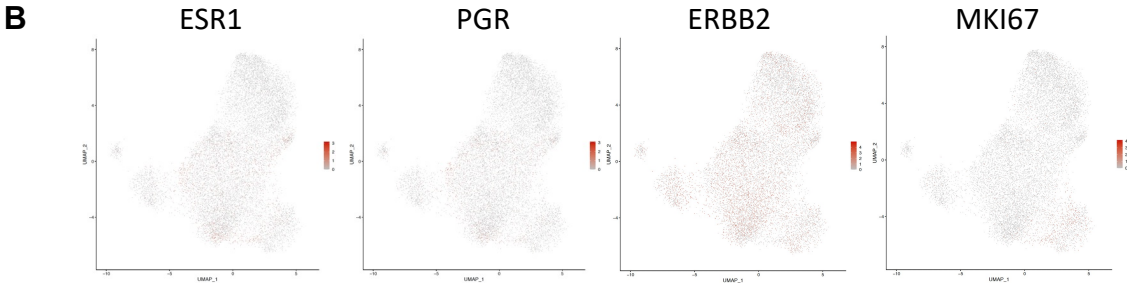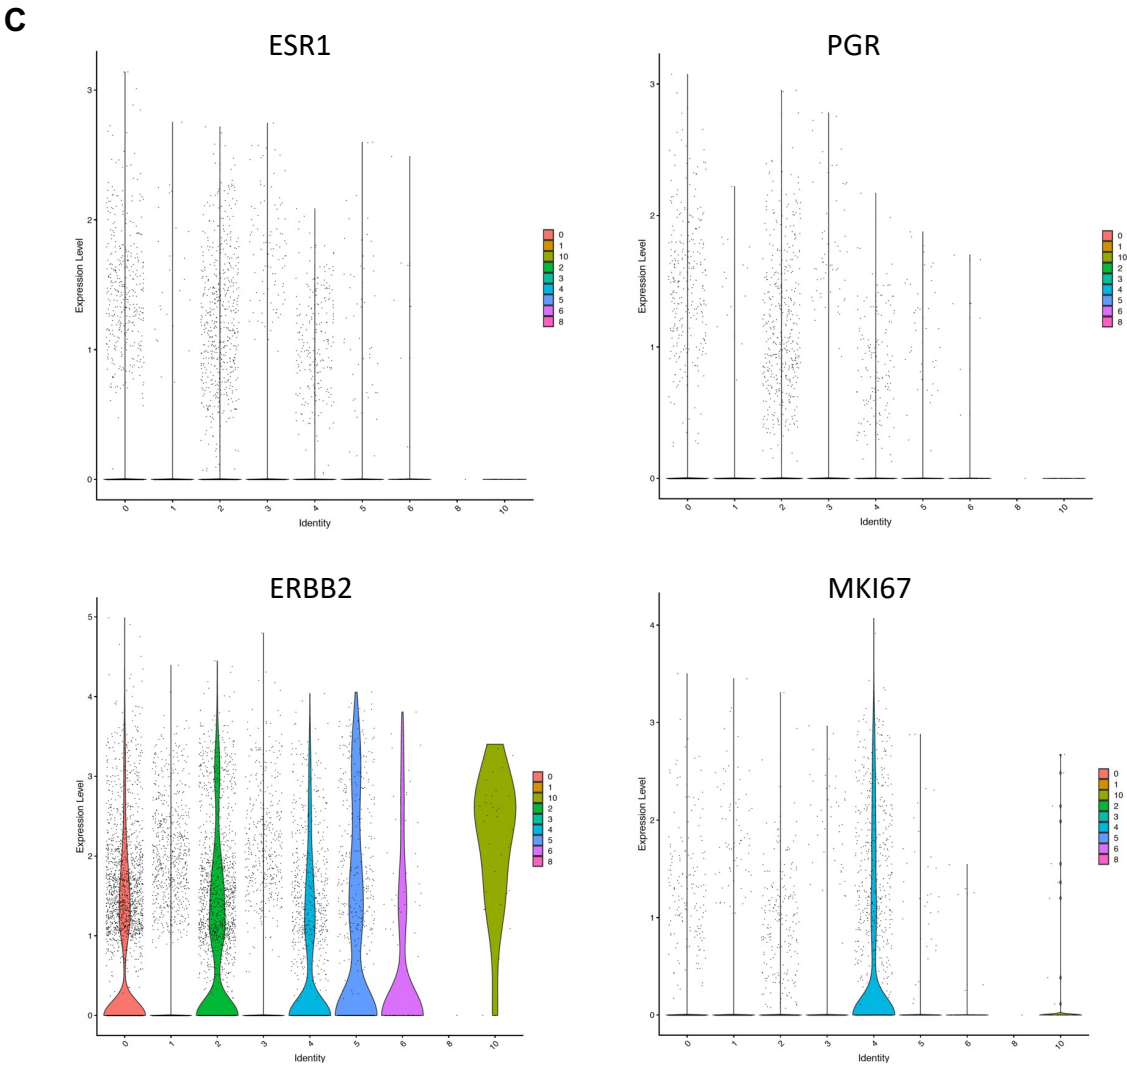

**A**

**Figure S3. Single-cell analysis of the epithelial components of luminal (ER-positive/HER2-negative) breast cancer**

(A) A UMAP plot of epithelial cells of the luminal breast samples.

(B) UMAP plots with representative marker expression.

(C) Violin plots with representative marker expression.

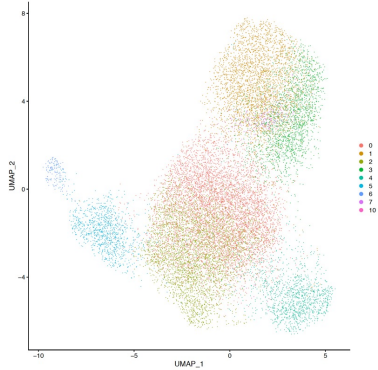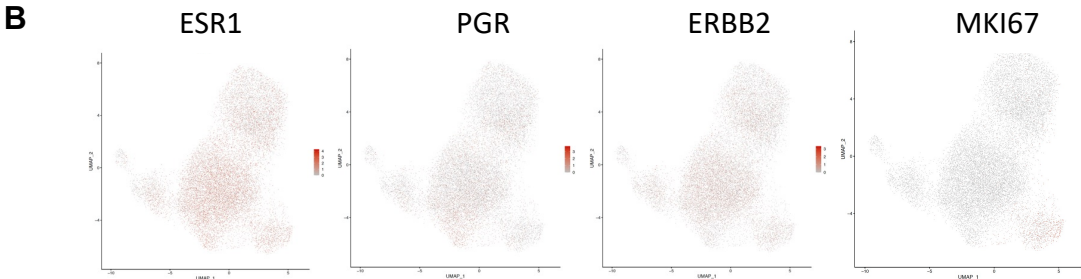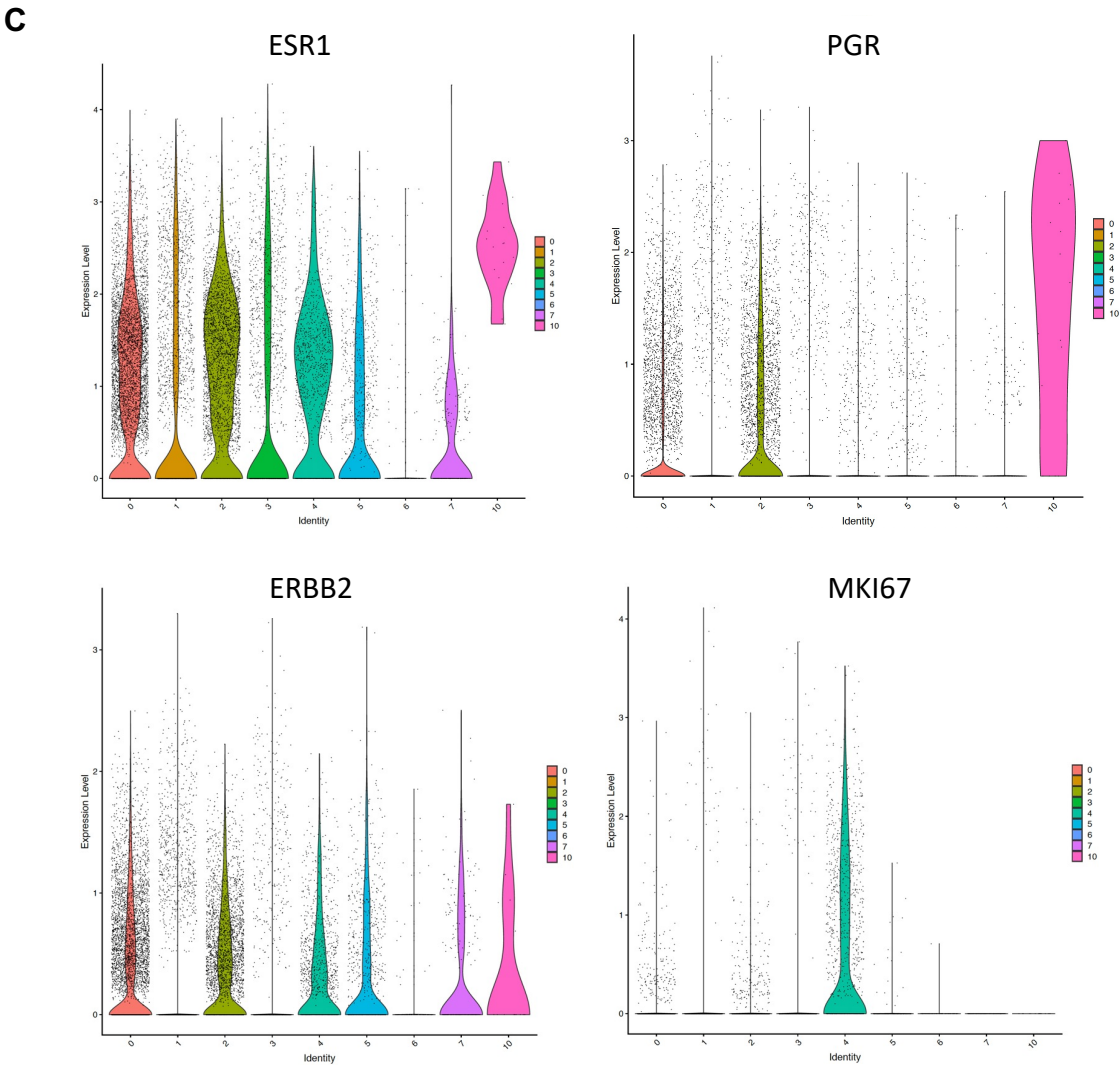

**Figure S4. Comparison of gene expression levels of representative breast cancer markers among the Luminal-HER2 subtype, pure-HER2 subtype, and Luminal subtype**

H: Luminal-HER2 subtype, L: pure-HER2 subtype, Luminal: Luminal subtype.  
N: The presence of HER2 amplification but not available for hormone receptor status on IHC results (Details are shown as Table S1 (a row named “Subtype)).

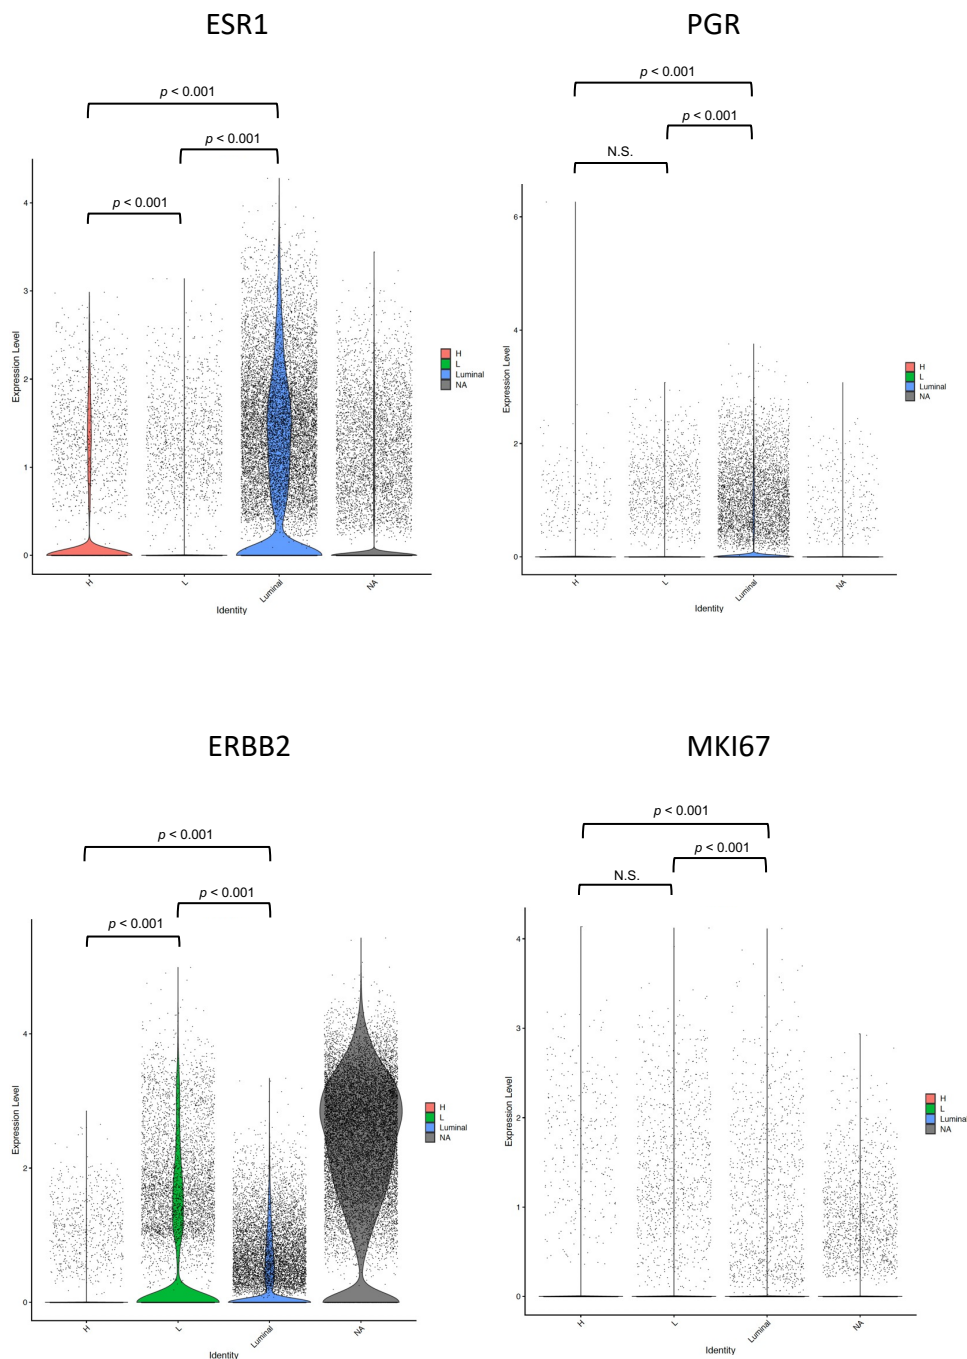

Supplement: s1 [file s1]
